# Supplementary material for: New Zealand Pae Ora Healthcare Reforms 2022: Viable by Design? A Qualitative Study Using the Viable System Model
Source: PubMed Central journal article supplement (PMC10843487; doi:10.34172/ijhpm.2023.7906), 2023-12-06
Supplement: ijhpm-12-7906-s001.pdf [file ijhpm-12-7906-s001.pdf]

**Article title:** New Zealand *Pae Ora* Healthcare Reforms 2022: Viable by Design? A Qualitative Study Using the Viable System Model

**Journal name:** International Journal of Health Policy and Management (IJHPM)

**Authors' information:** Adeel Akmal<sup>1,2\*</sup>, Nataliya Podgorodnichenko<sup>3</sup>, Robin Gauld<sup>4</sup>, Tim Stokes<sup>1\*</sup>

<sup>1</sup>Department of General Practice and Rural Health, Dunedin School of Medicine, University of Otago, Dunedin, New Zealand.

<sup>2</sup>Department of Business Studies, University of Iceland, Reykjavik, Iceland.

<sup>3</sup>DBA Programme, Otago Business School, University of Otago, Dunedin, New Zealand.

<sup>4</sup>Department of Management, Otago Business School, University of Otago, Dunedin, New Zealand.

**\*Correspondence to:** Adeel Akmal; Email: [adeel.akmal@otago.ac.nz](mailto:adeel.akmal@otago.ac.nz) & Tim Stokes; Email: [Tim.stokes@otago.ac.nz](mailto:Tim.stokes@otago.ac.nz)

**Citation:** Akmal A, Podgorodnichenko N, Gauld R, Stokes T. New Zealand *Pae Ora* healthcare reforms 2022: viable by design? a qualitative study using the viable system model. Int J Health Policy Manag. 2023;12:7906. doi:[10.34172/ijhpm.2023.7906](https://doi.org/10.34172/ijhpm.2023.7906)

**Supplementary file 1.** Details About Analysed Secondary Data

The news articles were collected using Factiva® database (Date: 11 April, 2022) with the following search string:

*“Health New Zealand” OR “Maori Health Authority” OR “Māori Health Authority”*

| Type of documents    | Number of documents | Source(s)                                                                                             |
|----------------------|---------------------|-------------------------------------------------------------------------------------------------------|
| Government documents | 99                  | futureofhealth.nz                                                                                     |
| Newspapers           | 237                 | New Zealand Herald – 82<br>NZ Doctor – 39<br>Dominion Post – 58<br>RNZ – 31<br>Otago Daily Times – 27 |
